# Supplementary material
Source: PubMed Central journal article supplement (PMC2148305)

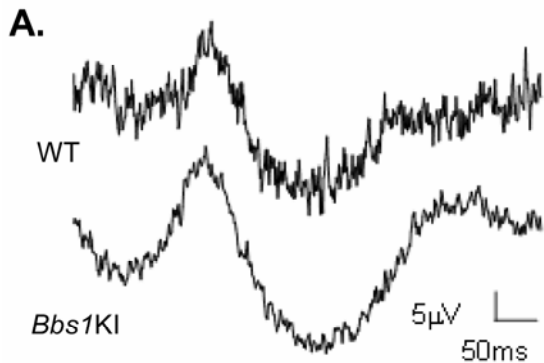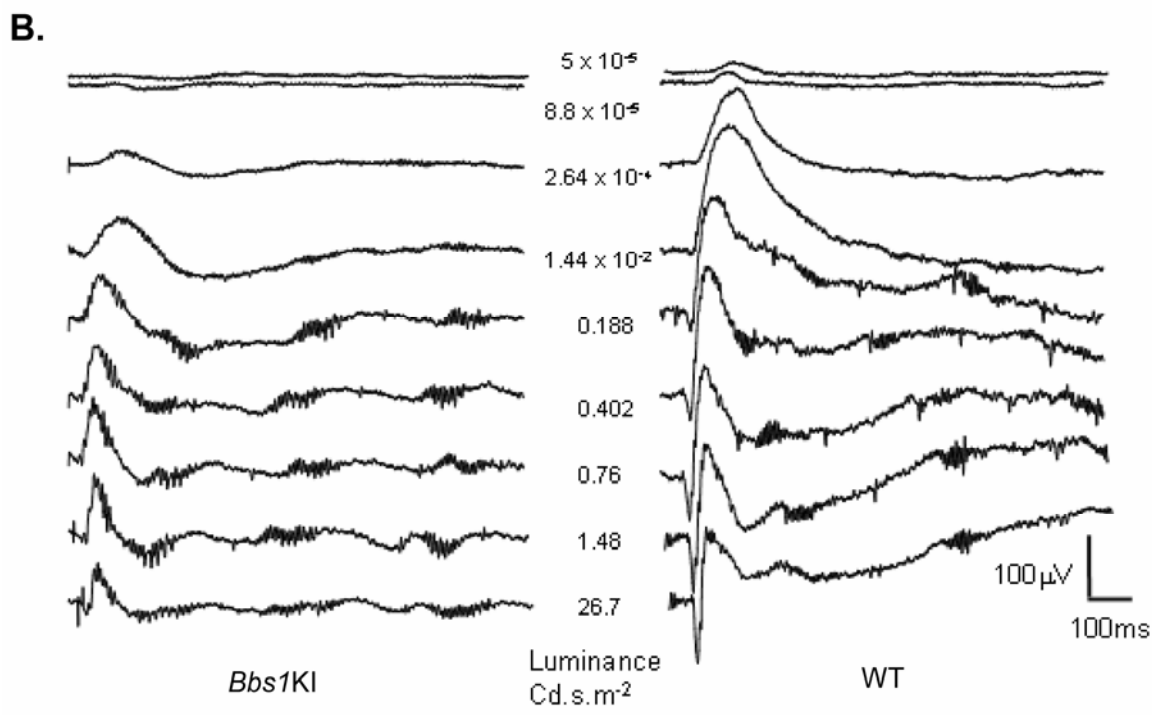

Supplement: pnas_0708571104_1.pdf [file pnas_0708571104_1.pdf]

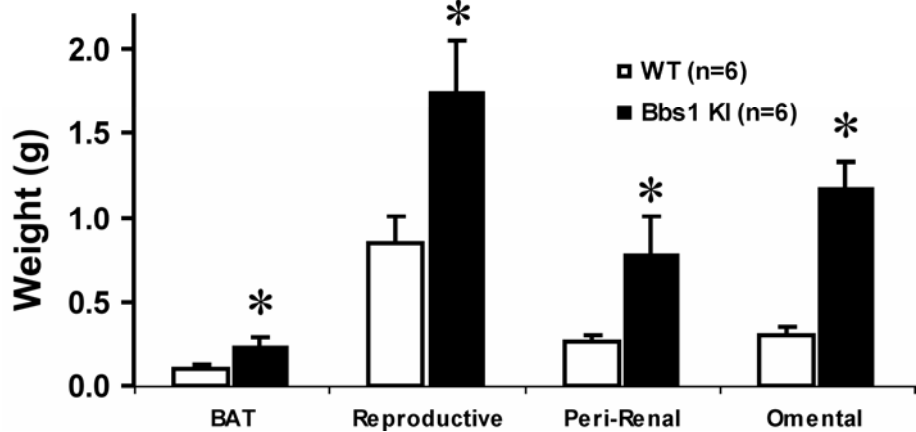

Supplement: pnas_0708571104_2.pdf [file pnas_0708571104_2.pdf]

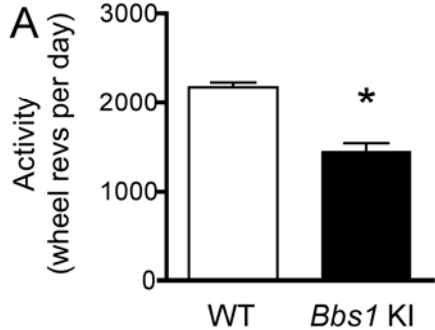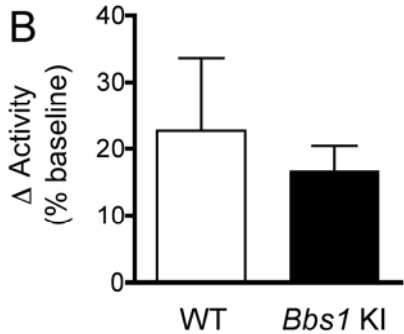

Supplement: pnas_0708571104_3.pdf [file pnas_0708571104_3.pdf]

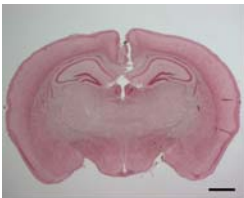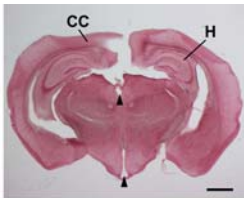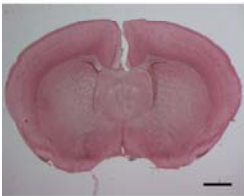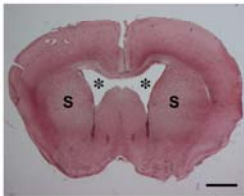

**Wild type**

***Bbs1* KI**

Supplement: pnas_0708571104_4.pdf [file pnas_0708571104_4.pdf]

**A.**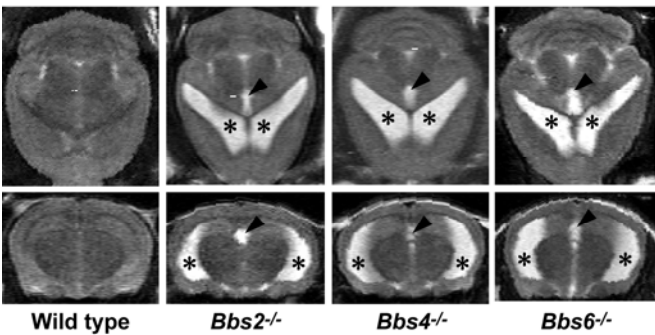**B.**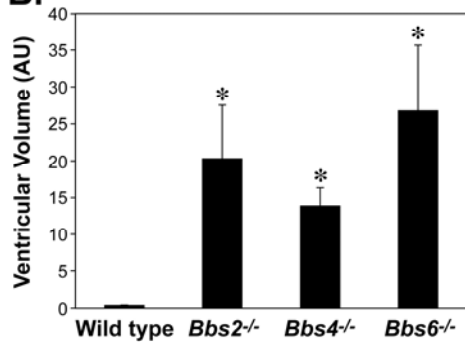**C.**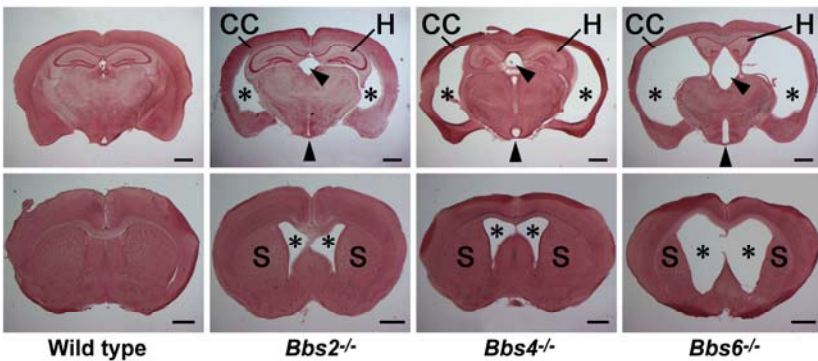

Supplement: pnas_0708571104_5.pdf [file pnas_0708571104_5.pdf]
